# Supplementary material for: Global cortical morphometry as a mediator of longitudinal associations between music participation and language outcomes in a population-based cohort
Source: Research Square preprint supplement (doi:10.21203/rs.3.rs-8664008/v1), 2026-02-03
Supplement: Supplementary file 1 [file 8935333cbe4172fe792770bf.docx]

**eMethod 1.** Baseline characteristics of participants with and without 2-year language data

**eMethod 2.** MRI acquisition, processing, quality control, and derivation of cortical measures

**eFigure.** Flowchart of twin subsample inclusion for sensitivity analysis

**eTable 1**. Baseline music participation exposures extracted from Parent-reported Sports and Activities Involvement Questionnaire (SAIQ)

**eTable 2.** Language outcomes at 2-year follow-up assessed using NIH Toolbox Cognition Battery

**eTable 3.** Cortical mediators derived from high-resolution T1-weighted MRI scans using standardized preprocessing and surface-based morphometric pipelines

**eTable 4**. Covariates included in analyses, including baseline demographic, socioeconomic, and perinatal and prenatal factors; child behavioral and emotional functioning; and broader enrichment activities

**eTable 5.** Mediation analyses examining global cortical structural measures as potential mediators of the association between baseline music participation and 2-year language outcomes in the twin subsample (N = 936)

**eReferences**

**eMethod 1. Baseline characteristics of participants with and without 2-year language data**

A subset of participants (N = 6,571) with complete 2-year language data in the ABCD 3.0 data release were included. To assess potential selection bias, we compared baseline characteristics, including age, sex, race/ethnicity, annual household income, parents’ marital status and education, preterm birth status, maternal alcohol and tobacco use during pregnancy, ADHD DSM-5 scale, social problem score, internalizing and externalizing scores, and counts of broader enrichment activities, between participants with and without 2-year language data.1 We applied a chi-square automatic interaction detection (CHAID) analysis to test whether these characteristics could reliably distinguish completion of the 2-year language assessments.2 The full sample (N=11,878) was randomly divided, stratified by follow-up status, into a 70% training set and a 30% validation set. The CHAID model achieved a classification accuracy of 56.2% on the validation set, virtually identical to the chance level of 55.3% (proportion of participants with 2-year language data). This difference of less than 1 percentage point indicates that measured baseline characteristics did not meaningfully differentiate participants with versus without 2-year language follow-up. Therefore, excluding participants missing language data is unlikely to have substantially biased our findings.3

**eMethod 2. MRI acquisition, processing, quality control, and derivation of cortical measures**

Complete MRI acquisition parameters and image processing pipelines are described elsewhere.4,5 Key procedures are summarized below:

- MRI Acquisition:
  Structural MRI data were collected at 21 sites on 3-T Siemens, GE, and Philips scanners using a standardized protocol developed by the ABCD Imaging Acquisition Workgroup. Each participant underwent high-resolution 3D T1-weighted and T2-weighted imaging.
- Automated Processing:
  The ABCD Data Analysis, Informatics, and Resource Center (DAIRC) conducted centralized, automated processing of all scans. Preprocessing included gradient nonlinearity correction, intensity inhomogeneity correction, and registration to a standard reference space. Cortical surface reconstruction and subcortical segmentation were performed using FreeSurfer.
- Quality Control:
  Trained DAIRC technicians manually reviewed all processed data. Quality checks included motion artifacts, intensity inhomogeneity, white matter underestimation, pial overestimation, and magnetic susceptibility artifacts.
- Derivation of Cortical Metrics:

Global cortical measures were derived from T1-weighted structural MRI data processed using standardized ABCD Study pipelines. Cortical surface reconstruction was performed with intensity- and topology-based segmentation to delineate the gray/white and pial surfaces. Total cortical surface area was computed as the sum of vertex-level areas, total cortical volume as the gray matter volume between surfaces, mean cortical thickness as the average distance between gray/white and pial surfaces, and mean sulcal depth as average depth of cortical folds relative to a spherical atlas.

**eFigure. Flowchart of twin subsample inclusion for sensitivity analysis**

**
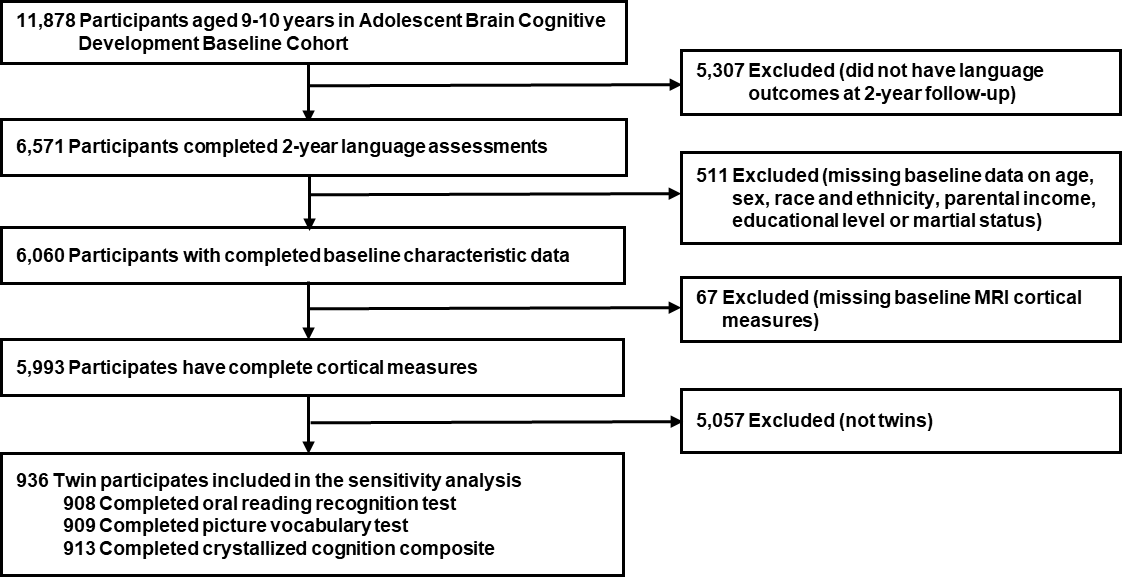
**

**eTable 1**. **Baseline music participation exposures extracted from Parent-reported Sports and Activities Involvement Questionnaire (SAIQ)**

Primary exposure: sustained music participation, a binary variable defined as participation in organized music activities (e.g., singing, choir, guitar, piano, drums, violin, flute, band, rock band, orchestra) for ≥4 continuous months (yes/no). Secondary exposures: practice frequency (days/week) and practice intensity (minutes/week = days/week × minutes/day), assuming one practice session per day. This approach is consistent with the design of the SAIQ, which collects activity frequency and typical session duration separately but does not query multiple sessions per day.

| **Description** | **ABCD Variable Name** | **Original coding** | **Coding for Analysis** |
| --- | --- | --- | --- |
| Sustained music participation: whether the child has ever participated in music activities (singing, choir, guitar, piano, drums, violin, glute, band, rock band, orchestra) for ≥4 continuous months | sai_p_activities___23 | 0 = No; 1 = Yes | Binary indicator: 0 = No; 1 = Yes |
| Practice frequency (days per week) | sai_p_music_perwk | 1 = 1; 2 = 2; 3 = 3; 4 = 4; 5 = 5; 6 = 6; 7 = 7; 8 = Once every 2 weeks | Codes 1–7 converted to corresponding days/week (1–7); code 8 converted to 0.5 days/week |
| Practice duration (minutes per session) | sai_p_music_tspent | 1 = less than 30 minutes; 2 = 30; 3 = 45; 4 = 60 (1 hr); 5 = 90 (1.5 hrs) 90; 6 = 120 (2 hrs); 7 = 150 (2.5 hrs); 8 = 180 (3 hrs); 9 = greater than 3 hours | Codes 1–2 recoded as 30 min; 3–4 as 60 min; 5 as 90 min; 6 as 120 min; 7 as 150 min; 8–9 as 180+ min |

**eTable 2. Language outcomes at 2-year follow-up assessed using** **NIH toolbox cognition battery**

| **Description** | **ABCD Variable Name** | **Original coding** | **Coding for Analysis** |
| --- | --- | --- | --- |
| Crystallized Composite: provides a comprehensive index of crystallized intelligence, reflecting accumulated knowledge and language-based skills | nihtbx_cryst_agecorrected | Age-adjusted, standardized to NIH Toolbox norms (mean = 100, SD = 15); higher scores indicate better performance | Same as original coding |
| Picture Vocabulary Test: evaluates receptive vocabulary | nihtbx_picvocab_agecorrected |
| Oral Reading Recognition Test: measures reading decoding skills | nihtbx_reading_agecorrected |

**eTable 3.** C**ortical mediators derived from high-resolution T1-weighted MRI scans using standardized preprocessing and surface-based morphometric pipelines**

| **Description** | **ABCD Variable Name** | **Original coding** | **Coding for Analysis** |
| --- | --- | --- | --- |
| Mean cortical thickness | smri_thick_cdk_mean | Continuous values in mm | Same as original coding |
| Mean cortical sulcal depth | smri_sulc_cdk_mean | Continuous values in mm |
| Total cortical surface area | smri_area_cdk_total | Continuous values in mm2 |
| Total cortical volume | smri_vol_cdk_total | Continuous values in mm3 |

**eTable 4.** **Covariates included in analyses, including baseline demographic, socioeconomic, and perinatal and prenatal factors; child behavioral and emotional functioning; and broader enrichment activities**

| **Category** | **ABCD variable Name** | **Original coding** | **Coding for Analysis** |
| --- | --- | --- | --- |
| **Demographics** | | | |
| Age at interview | interview_age | Continuous, in months | Continuous, converted to years |
| Sex assigned at birth | sex | 1 = Male; 2 = Female; other options were available in the questionnaire but only 1 and 2 were present in the released baseline dataset | Same as original coding |
| Race/ethnicity | race_ethnicity | 1 = White; 2 = Black; 3 = Hispanic; 4 = Asian; 5 = Other | Same as original coding |
| **Socioeconomic factor** | | | |
| Annual household income, $  What is your TOTAL COMBINED FAMILY INCOME for the past 12 months? This should include income (before taxes and deductions) from all sources, wages, rent from properties, social security, disability and/or veteran's benefits, unemployment benefits, workman's compensation, help from relative (include child payments and alimony) | demo_comb_income_v2 | 1= Less than $5,000; 2=$5,000 through $11,999; 3=$12,000 through $15,999; 4=$16,000 through $24,999; 5=$25,000 through $34,999; 6=$35,000 through $49,999; 7=$50,000 through $74,999; 8= $75,000 through $99,999; 9=$100,000 through $199,999; 10=$200,000 and greater. 999 = Don't know; 777 = Refuse to answer | Binary:  < $50,000 (codes 1-6);  ≥ $50,000 (codes 7-10) |
| Parents’ marital status  Are you now married, widowed, divorced, separated, never married or living with a partner? | demo_prnt_marital_v2 | 1 = Married; 2 = Widowed; 3 = Divorced; 4 = Separated; 5 = Never married; 6 = Living with partner; 777 = Refused to answer | 3-class:  Married (code 1); Single Parent (codes 2-5);  Living with Partner (code 6) |
| Parents’ education  What is the highest grade or level of school you have completed or the highest degree you have received? | Demo_prnt_ed_v2 | 0 = Never attended/Kindergarten only; 1 = 1st grade; 2 = 2nd grade; 3 = 3rd grade; 4 = 4th grade; 5 = 5th grade; 6 = 6th grade; 7 = 7th grade; 8 = 8th grade; 9 = 9th grade; 10 = 10th grade; 11 = 11th grade; 12 = 12th grade; 13 = High school graduate; 14 = GED or equivalent Diploma General; 15 = Some college; 16 = Associate degree: Occupational; 17 = Associate degree: Academic Program; 18 = Bachelor's degree (ex. BA; 19 = Master's degree (ex. MA; 20 = Professional School degree (ex. MD; 21 = Doctoral degree (ex. PhD; 777 = Refused to answer | Binary  < Some college (codes 0-14);  ≥ Some college (codes 15-21) |
| **Perinatal and prenatal factors** | | | |
| Preterm-birth status  Was the child born prematurely? | |  | | --- |  | devhx_12a_p | | --- | | 1 = Yes; 0 = No; 999 = Don't know | Three-class: Yes, No, Don’t know |
| Maternal alcohol use in pregnancy | devhx_9_alcohol | 1 = Yes; 0 = No; 999 = Don't know |
| Maternal tobacco use in pregnancy | devhx_9_tobacco | 1 = Yes; 0 = No; 999 = Don't know |
| **Child Behavior and Emotional Functioning assessed using Child Behavior Checklist (CBCL) T scores** | | | |
| ADHD DSM-5 Scale | cbcl_scr_dsm5_adhd_t | Continuous T-scores (range 0-100; mean = 50, SD = 10) | Same as original coding |
| Social Problems | cbcl_scr_syn_social_t |
| Internalizing symptoms | cbcl_scr_syn_internal_t |
| Externalizing symptoms | cbcl_scr_syn_external_t |
| **Broader enrichment activities from Parent-reported Sports and Activities Involvement Questionnaire (SAIQ), capturing participation in the following activities for ≥4 continuous months.** | | | |
| Team Sports (count: baseball/softball, basketball, football, soccer) | sai_p_activities___1  sai_p_activities___2  sai_p_activities___5  sai_p_activities___15 | Binary participation: 1= Yes; 0= No | Integer: Sum of all 1s |
| Individual Sports (count: gymnastics, martial arts, swimming) | sai_p_activities___6  sai_p_activities___10  sai_p_activities___17 | Binary participation: 1= Yes; 0= No | Integer: Sum of all 1s |
| Creative arts (count: ballet, dance, drawing, painting, graphic art, photography, pottery, sculpting) | sai_p_activities___0  sai_p_activities___24 | Binary participation: 1= Yes; 0= No | Integer: Sum of all 1s |

**eTable 5. Mediation analyses examining global cortical structural measures as potential mediators of the association between baseline music participation and 2-year language outcomes in the twin subsample (N = 936)**

| **Exposure** | **Cortical Mediators** | **Total Effect**  **β**  **(95% CI)*** | **Indirect Effect**  **β (95% CI)** | **q value** | **Direct Effect**  **β (95% CI)** | **Proportion mediated, %** |
| --- | --- | --- | --- | --- | --- | --- |
| **Sustained Music Participation** | **Language Outcome: Crystallized Cognition Composite (N = 913)** | | | | | |
| Thickness | 2.172  (0.482, 3.862) | 0.022  (-0.074, 0.118) | 0.887 | 2.133  (0.443, 3.824) | — |
| Sulcal Depth | 0.003  (-0.034, 0.039) | 0.887 | 2.167  (0.475, 3.859) | — |
| Surface Area | 0.347  (0.067, 0.627) | 0.019 | 1.906  (0.234, 3.578) | 16 |
| Volume | 0.345  (0.056, 0.633) | 0.019 | 1.894  (0.224, 3.563) | 15.9 |
| **Language Outcome: Picture Vocabulary Test (N = 909)** | | | | | |
| Thickness | 2.924  (1.134, 4.714) | 0.022  (-0.073, 0.116) | 0.655 | 2.88  (1.09, 4.67) | — |
| Sulcal Depth | -0.019  (-0.09, 0.052) | 0.655 | 2.955  (1.164, 4.747) | — |
| Surface Area | 0.295  (0.032, 0.558) | 0.030 | 2.668  (0.883, 4.453) | 10.1 |
| Volume | 0.297  (0.03, 0.565) | 0.030 | 2.638  (0.855, 4.421) | 10.2 |
| **Language Outcome: Oral Reading Recognition Test (N = 908)** | | | | | |
| Thickness | 1.901  (0.123, 3.679) | 0.008  (-0.035, 0.051) | 0.729 | 1.887  (0.107, 3.668) | — |
| Sulcal Depth | 0.017  (-0.048, 0.082) | 0.729 | 1.878  (0.100, 3.656) | — |
| Surface Area | 0.254  (0.009, 0.498) | 0.047 | 1.688  (-0.084, 3.461) | 13.4 |
| Volume | 0.242  (0.004, 0.481) | 0.047 | 1.680  (-0.093, 3.454) | 12.7 |
| **Exposures** | **Cortical Mediators** | **Total Effect**  **β (95% CI)*** | **Indirect Effect**  **β (95% CI)** | **q value** | **Direct Effect**  **β (95% CI)** | **Proportion mediated, %** |
| **Practice Intensity** | **Language Outcome: Crystallized Cognition Composite (N = 913)** | | | | | |
| Thickness | 0.341  (-0.404, 1.087) | 0.025  (-0.026, 0.077) | 0.664 | 0.320  (-0.425, 1.066) | — |
| Sulcal Depth | 0.001  (-0.008, 0.009) | 0.869 | 0.340  (-0.406, 1.086) | — |
| Surface Area | 0.072  (-0.033, 0.176) | 0.181 | 0.264  (-0.472, 1.001) | — |
| Volume | 0.114  (-0.005, 0.232) | 0.122 | 0.235  (-0.501, 0.971) | — |
| **Language Outcome: Picture Vocabulary Test (N = 909)** | | | | | |
| Thickness | 0.271  (-0.511, 1.054) | 0.025  (-0.027, 0.078) | 0.684 | 0.246  (-0.536, 1.028) | — |
| Sulcal Depth | -0.003  (-0.028, 0.022) | 0.818 | 0.276  (-0.507, 1.058) | — |
| Surface Area | 0.063  (-0.032, 0.158) | 0.191 | 0.216  (-0.561, 0.993) | — |
| Volume | 0.101  (-0.009, 0.212) | 0.142 | 0.181  (-0.596, 0.957) | — |
| **Language Outcome: Oral Reading Recognition Test (N = 908)** | | | | | |
| Thickness | 0.465  (-0.311, 1.241) | 0.009  (-0.027, 0.044) | 0.818 | 0.457  (-0.321, 1.234) | — |
| Sulcal Depth | 0.003  (-0.022, 0.028) | 0.818 | 0.460  (-0.316, 1.236) | — |
| Surface Area | 0.053  (-0.029, 0.134) | 0.205 | 0.428  (-0.344, 1.199) | — |
| Volume | 0.080  (-0.013, 0.173) | 0.18 | 0.403  (-0.369, 1.176) | — |
| **Exposures** | **Cortical Mediators** | **Total Effect**  **β (95% CI)*** | **Indirect Effect**  **β (95% CI)** | **q value** | **Direct Effect**  **β (95% CI)** | **Proportion mediated, %** |
| **Practice Frequency** | **Language Outcome: Crystallized Cognition Composite (N = 913)** | | | | | |
| Thickness | -0.177  (-0.969, 0.615) | 0.022  (-0.028, 0.071) | 0.776 | -0.190  (-0.982, 0.602) | — |
| Sulcal Depth | -0.002  (-0.02, 0.016) | 0.828 | -0.175  (-0.967, 0.618) | — |
| Surface Area | -0.039  (-0.142, 0.063) | 0.881 | -0.146  (-0.927, 0.635) | — |
| Volume | 0.008  (-0.102, 0.119) | 0.881 | -0.177  (-0.957, 0.603) | — |
| **Language Outcome: Picture Vocabulary Test (N = 909)** | | | | | |
| Thickness | 0.029  (-0.753, 0.811) | 0.022  (-0.028, 0.072) | 0.594 | 0.01  (-0.772, 0.792) | — |
| Sulcal Depth | 0.008  (-0.022, 0.038) | 0.594 | 0.022  (-0.76, 0.805) | — |
| Surface Area | -0.035  (-0.126, 0.057) | 0.881 | 0.069  (-0.707, 0.846) | — |
| Volume | 0.008  (-0.091, 0.106) | 0.881 | 0.034  (-0.741, 0.809) | — |
| **Language Outcome: Oral Reading Recognition Test (N = 908)** | | | | | |
| Thickness | -0.026  (-0.799, 0.747) | 0.008  (-0.023, 0.04) | 0.615 | -0.032  (-0.806, 0.742) | — |
| Sulcal Depth | -0.008  (-0.039, 0.022) | 0.615 | -0.019  (-0.792, 0.754) | — |
| Surface Area | -0.029  (-0.107, 0.048) | 0.881 | 0.019  (-0.749, 0.787) | — |
| Volume | 0.006  (-0.073, 0.085) | 0.881 | -0.010  (-0.778, 0.758) | — |

**Note.** Analyses were conducted in the twin subsample from the ABCD Study (total N = 936), with outcome-specific sample sizes shown in the table. Linear mixed-effects models with a family-level random intercept were used to account for within-family clustering. Models were adjusted for baseline language performance, demographics (age, sex, race/ethnicity), socioeconomic factors (household income, parental education, marital status), prenatal and perinatal factors (preterm birth status, maternal alcohol and tobacco use during pregnancy), behavioral and emotional functioning (ADHD DSM-5–oriented scale, social problems, internalizing and externalizing problems), extracurricular activities (counts of team sports, individual sports, and creative arts activities), and study site. β denotes the standardized regression coefficient with 95% confidence intervals based on conventional standard errors. q values represent Benjamini–Hochberg false discovery rate–adjusted P values; q < .05 was considered statistically significant. *The total effect reflects the association between the exposure and outcome and is therefore identical across mediator-specific models.

**eReferences**

1. Howe CJ, Cole SR, Lau B, Napravnik S, Eron JJ, Jr. Selection Bias Due to Loss to Follow Up in Cohort Studies. *Epidemiology*. Jan 2016;27(1):91–7. doi:10.1097/ede.0000000000000409

2. Venkatasubramaniam A, Wolfson J, Mitchell N, Barnes T, JaKa M, French S. Decision trees in epidemiological research. *Emerg Themes Epidemiol*. 2017;14:11. doi:10.1186/s12982-017-0064-4

3. Barkho W, Carnes NC, Kolaja CA, et al. Utilizing machine learning to predict participant response to follow-up health surveys in the Millennium Cohort Study. *Sci Rep*. Oct 28 2024;14(1):25764. doi:10.1038/s41598-024-77563-8

4. Casey BJ, Cannonier T, Conley MI, et al. The Adolescent Brain Cognitive Development (ABCD) study: Imaging acquisition across 21 sites. *Dev Cogn Neurosci*. Aug 2018;32:43–54. doi:10.1016/j.dcn.2018.03.001

5. Hagler DJ, Jr., Hatton S, Cornejo MD, et al. Image processing and analysis methods for the Adolescent Brain Cognitive Development Study. *Neuroimage*. Nov 15 2019;202:116091. doi:10.1016/j.neuroimage.2019.116091
